# Supplementary material for: Symptoms and signs of colorectal cancer, with differences between proximal and distal colon cancer: a prospective cohort study of diagnostic accuracy in primary care
Source: PubMed Central journal article supplement (PMC8268573; doi:10.1186/s12875-021-01452-6), 2021-07-08
Supplement: 12875_2021_1452_MOESM1_ESM.pdf [file 12875_2021_1452_MOESM1_ESM.pdf]

**”Abdominal symptoms and cancer”  
Comments**

Particularly for the questions 12, 27-29 and 35-36

| Patient nr. |                                                                                                  |
|-------------|--------------------------------------------------------------------------------------------------|
| 1           | 35: Malignant melanoma, operated year 2000, considered cured                                     |
| 2           |                                                                                                  |
| 3           |                                                                                                  |
| 4           |                                                                                                  |
| 5           | 12: Episodes of sudden, violent pain in urethra when urinating lasting 15-30 seconds, lithiasis? |
| 6           |                                                                                                  |
| 7           |                                                                                                  |
| 8           |                                                                                                  |
| 9           |                                                                                                  |
| 10          |                                                                                                  |
| 11          |                                                                                                  |
| 12          |                                                                                                  |
| 13          |                                                                                                  |
| 14          |                                                                                                  |
| 15          |                                                                                                  |
| 16          |                                                                                                  |
| 17          |                                                                                                  |
| 18          |                                                                                                  |
| 19          |                                                                                                  |
| 20          |                                                                                                  |
